# Supplementary figures and images for: Exosomal miR-485-3p derived from pancreatic ductal epithelial cells inhibits pancreatic cancer metastasis through targeting PAK1
Source: PubMed Central journal article supplement — Chin Med J (Engl). 2022 Nov 17;135(19):2326–37. doi: 10.1097/CM9.0000000000002154 (PMC9771326; doi:10.1097/cm9.0000000000002154), 2022-11-17

**Fig S1**

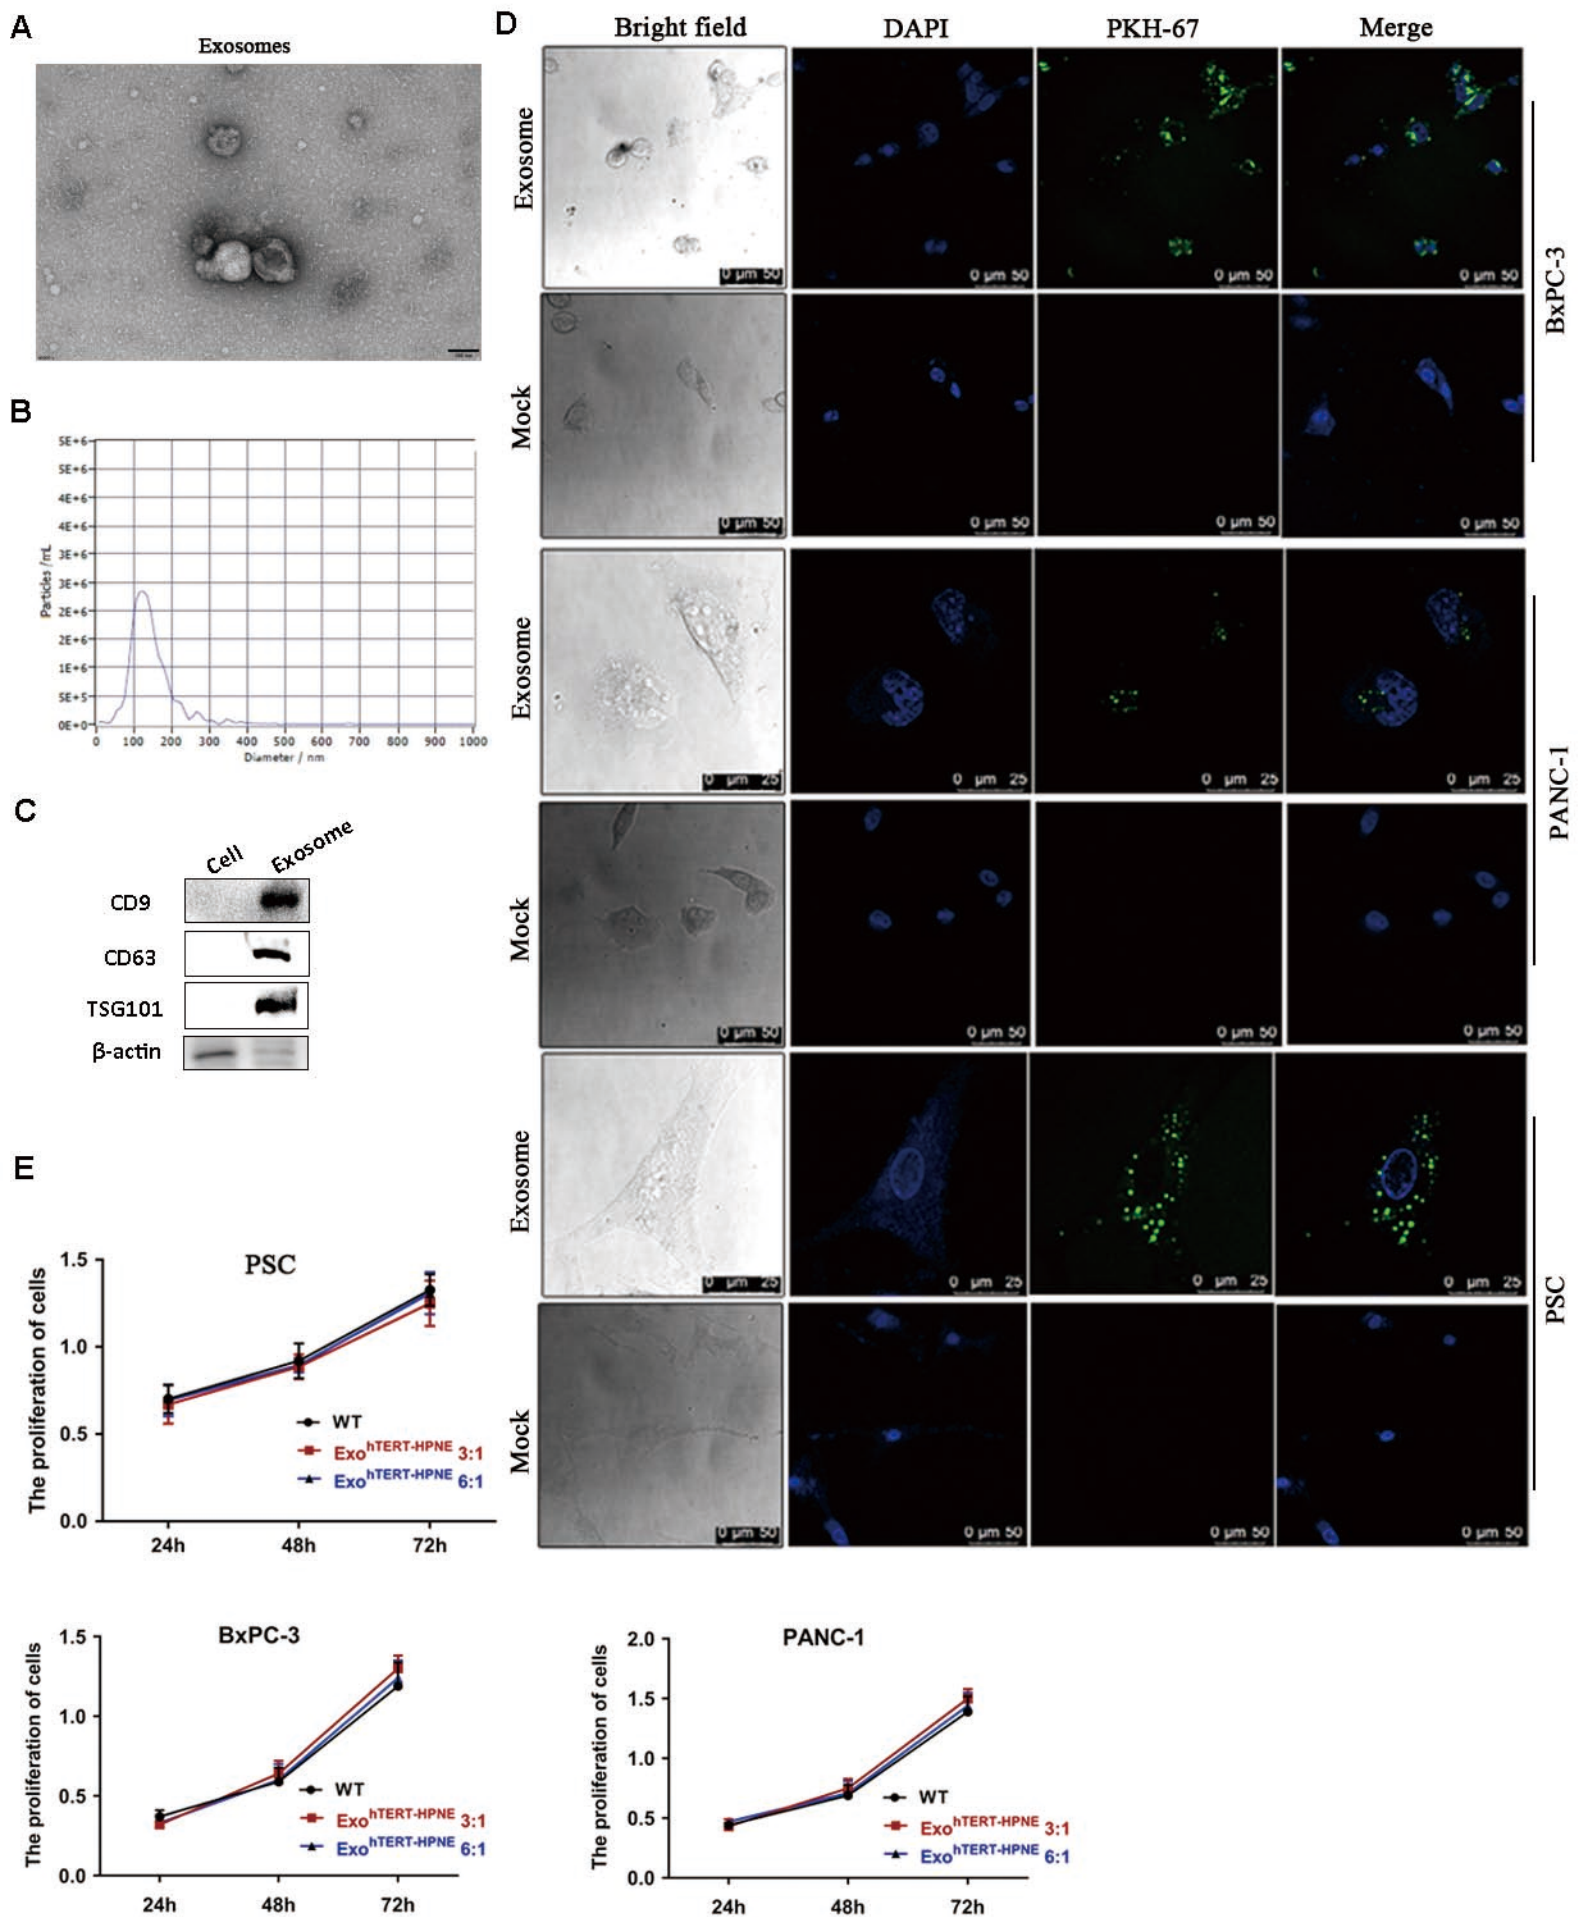

Supplement: cm9-135-2326-s001.pdf [file cm9-135-2326-s001.pdf]
